# Supplementary material
Source: PubMed Central journal article supplement (PMC10127584)

# Supplementary Figures

S1

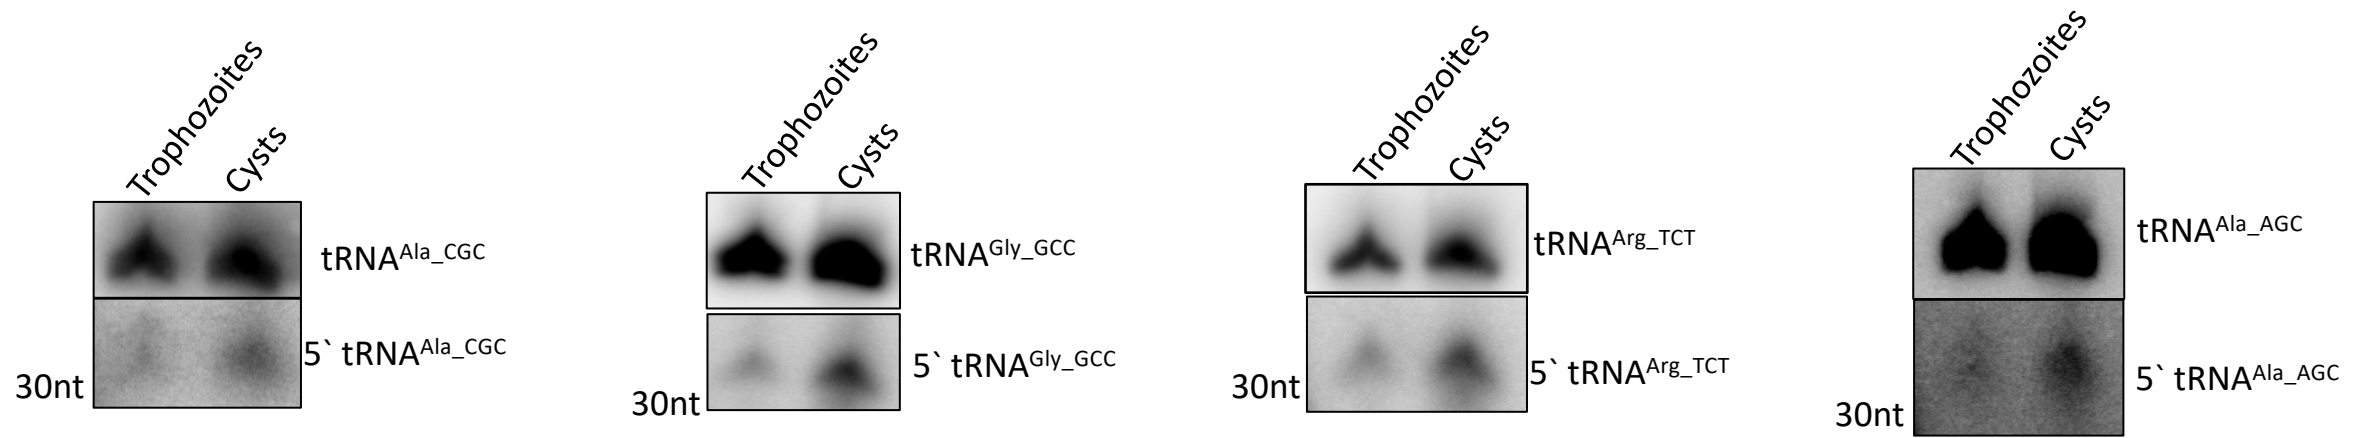

Supplement: mbio.03450-22-s0001.pdf [file mbio.03450-22-s0001.pdf]

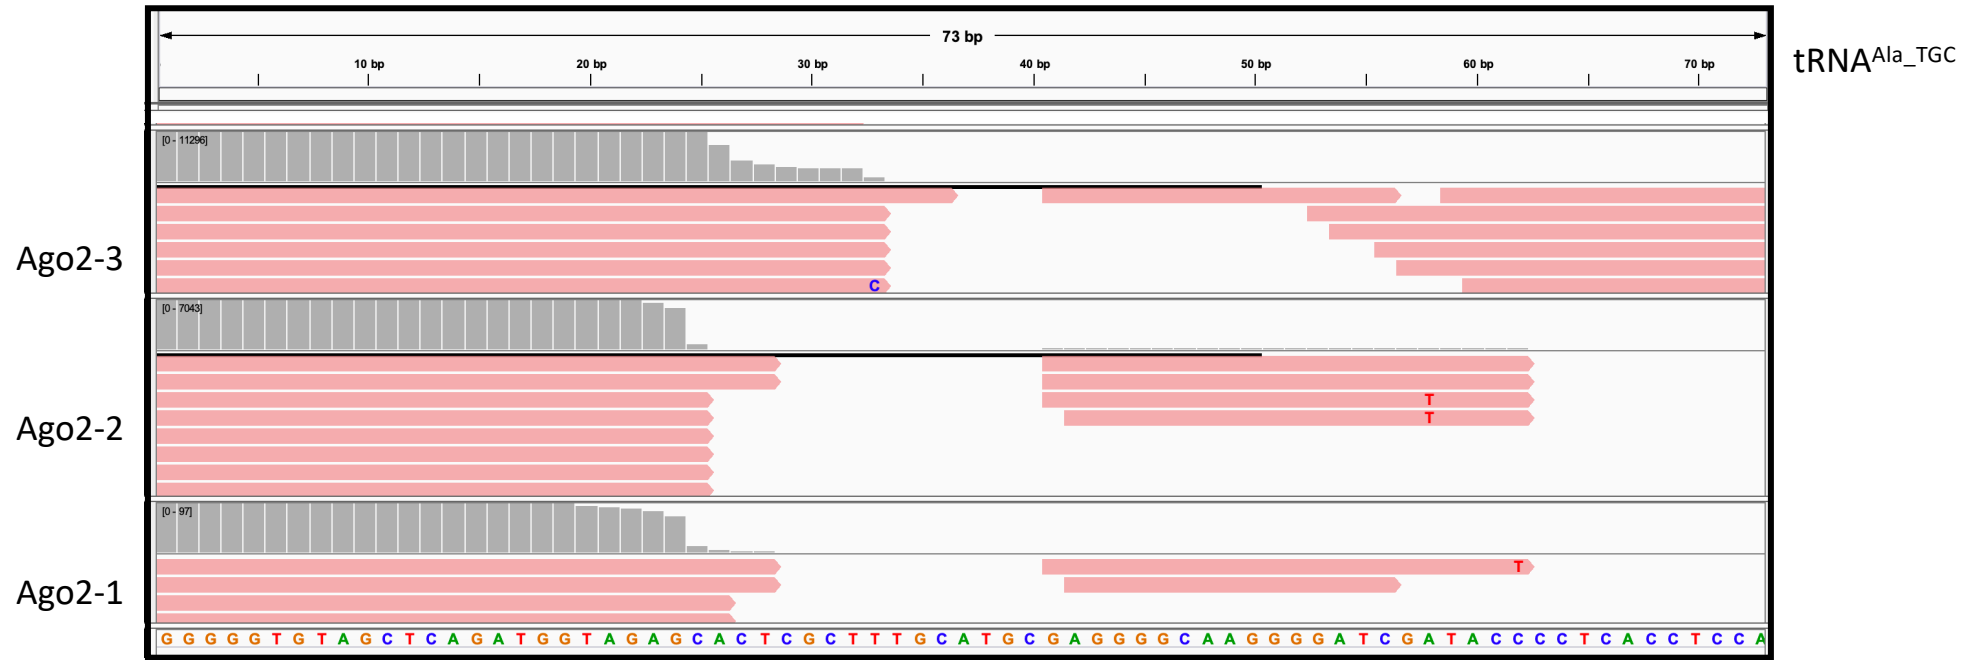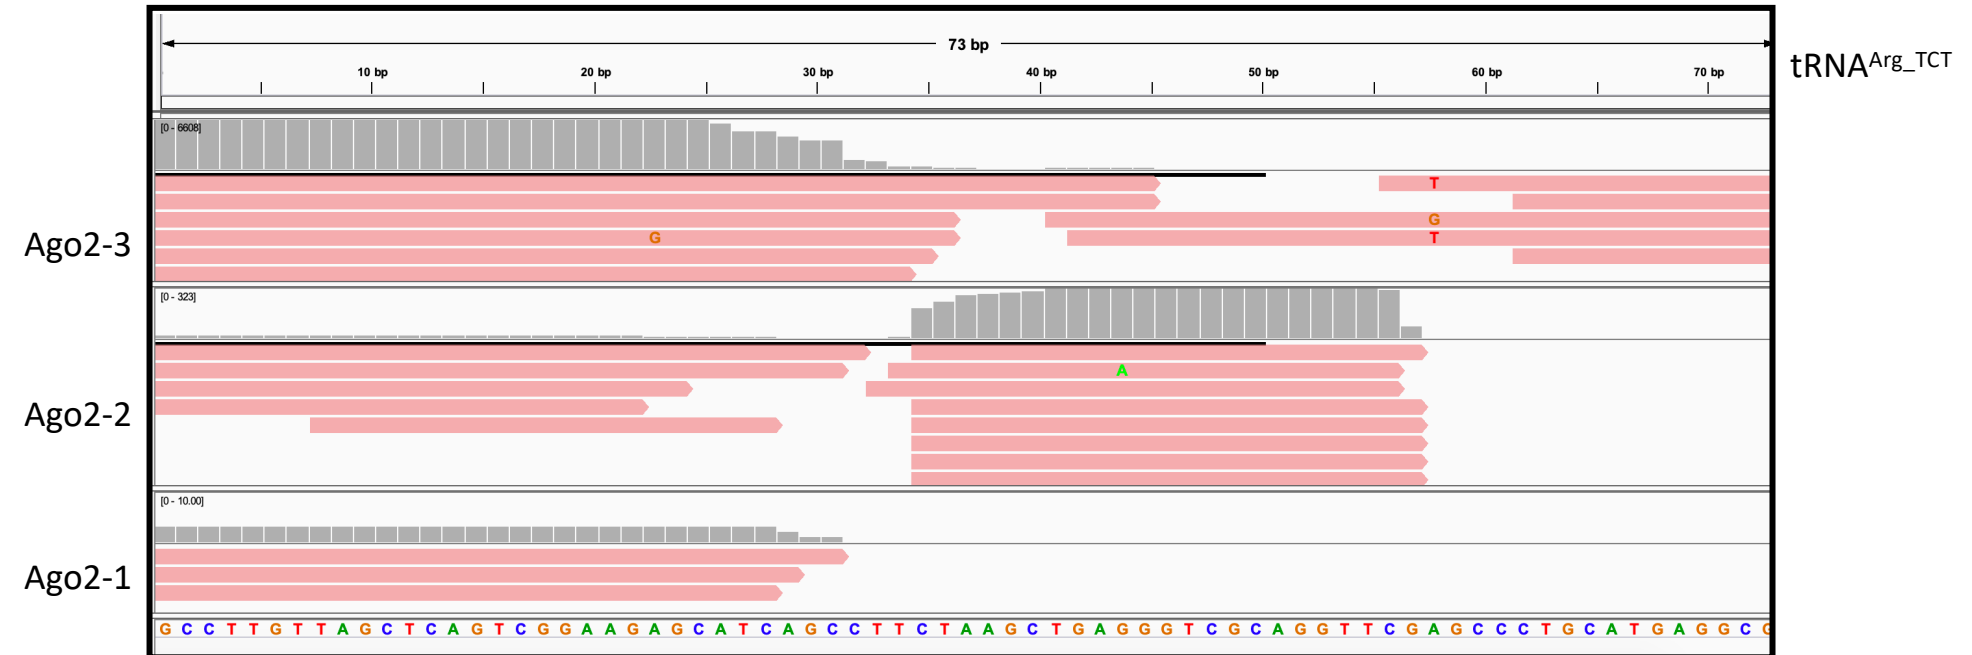

Supplement: mbio.03450-22-s0002.pdf [file mbio.03450-22-s0002.pdf]

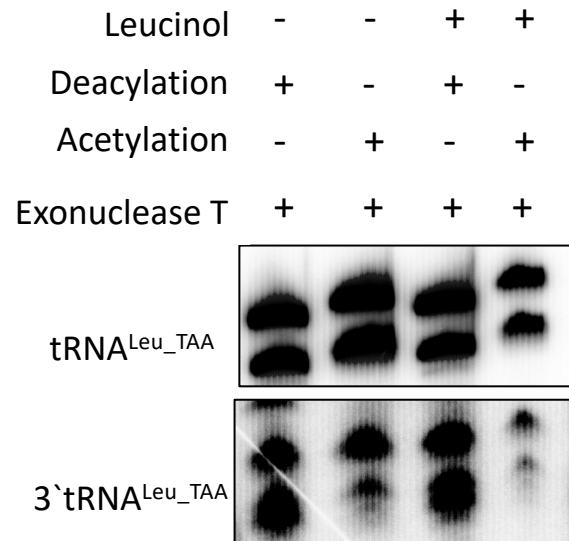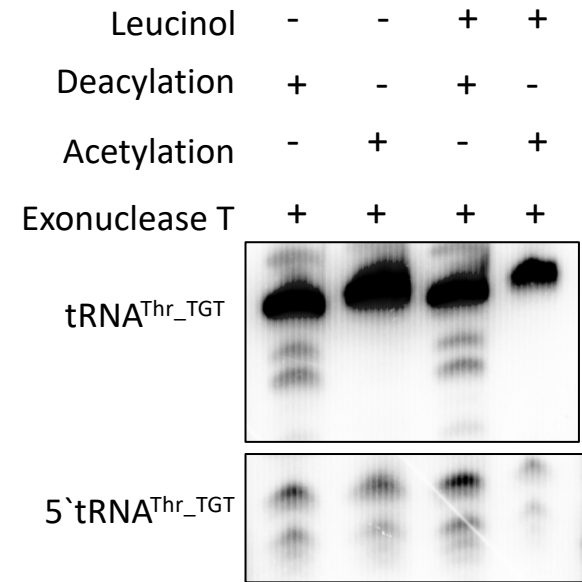

Supplement: mbio.03450-22-s0003.pdf [file mbio.03450-22-s0003.pdf]

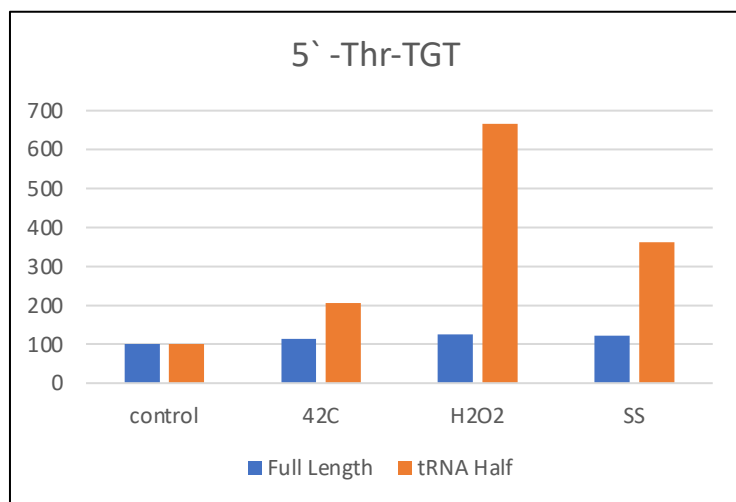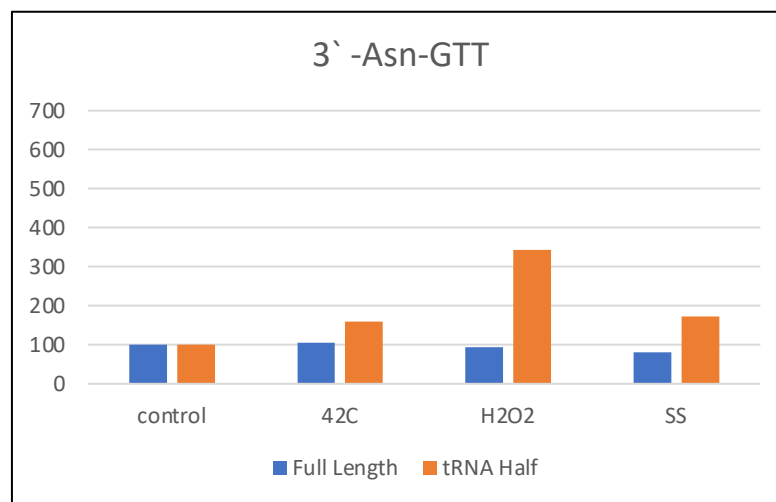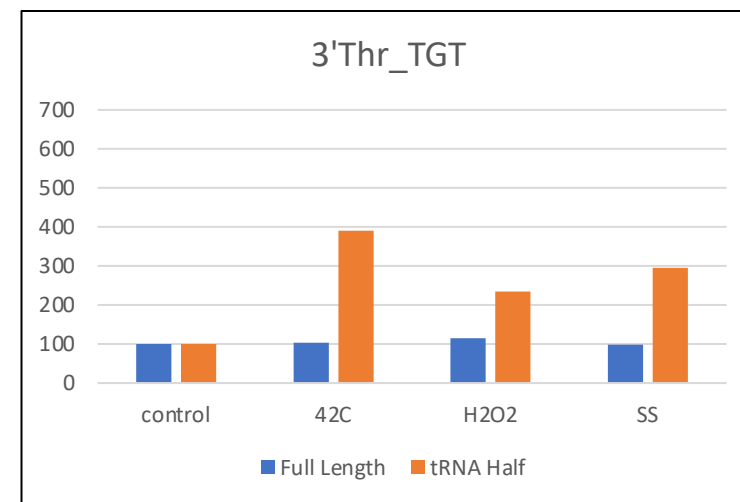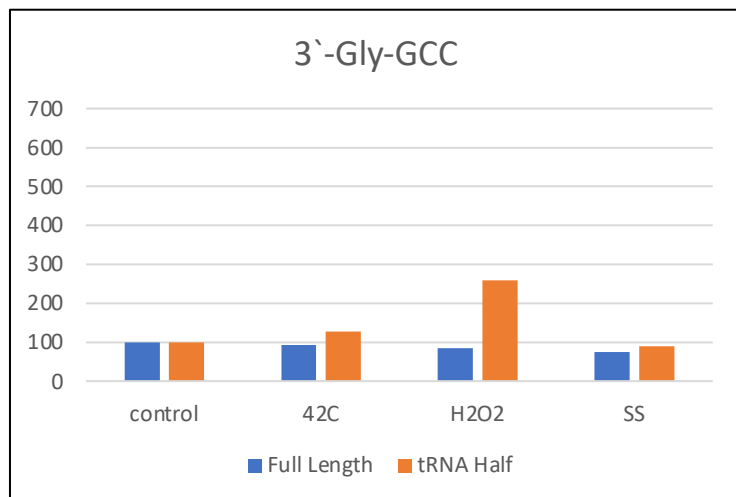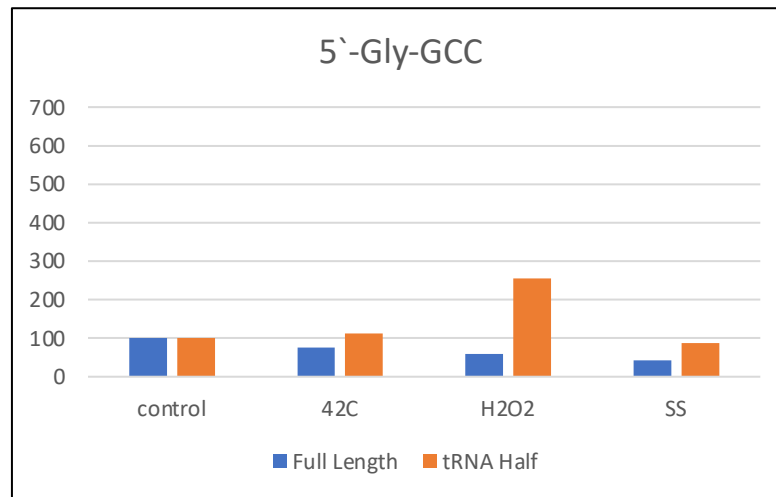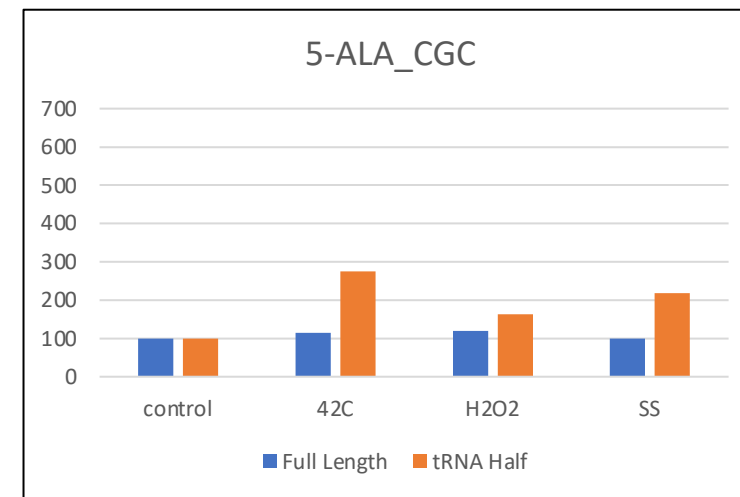

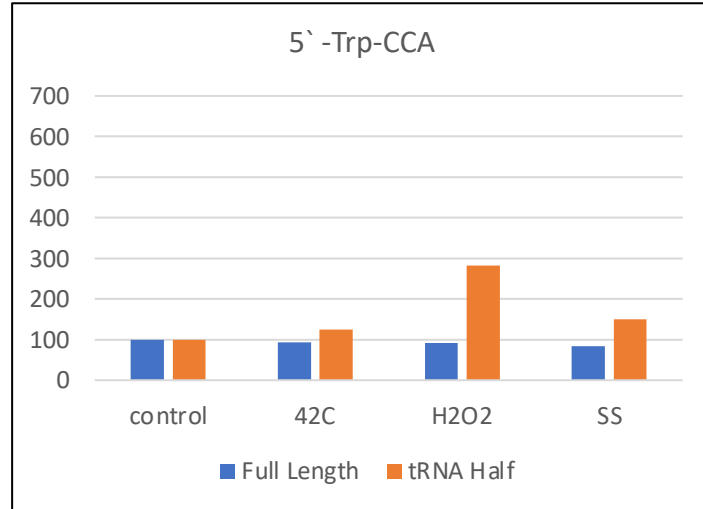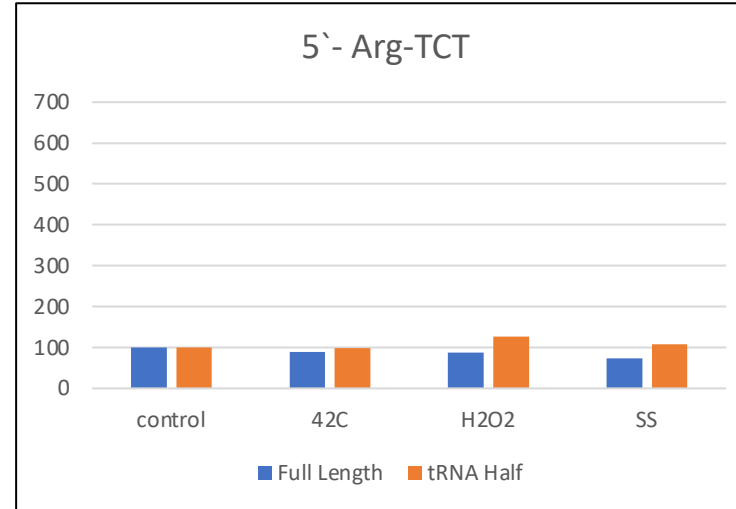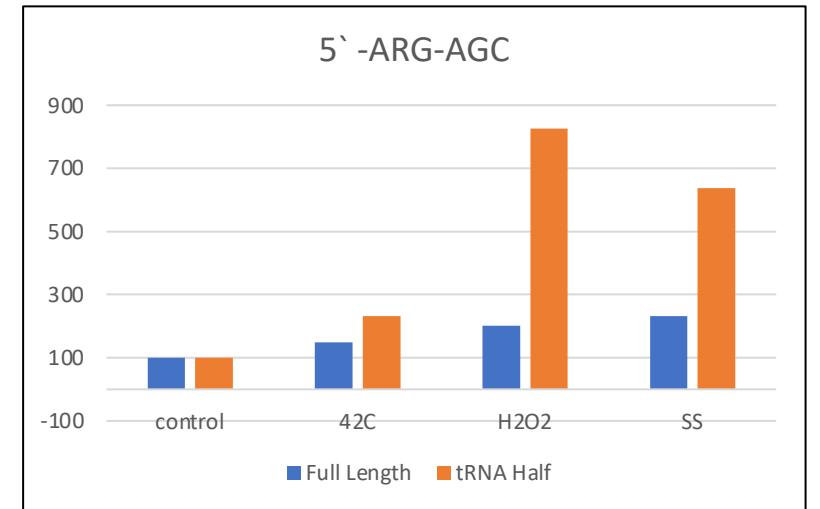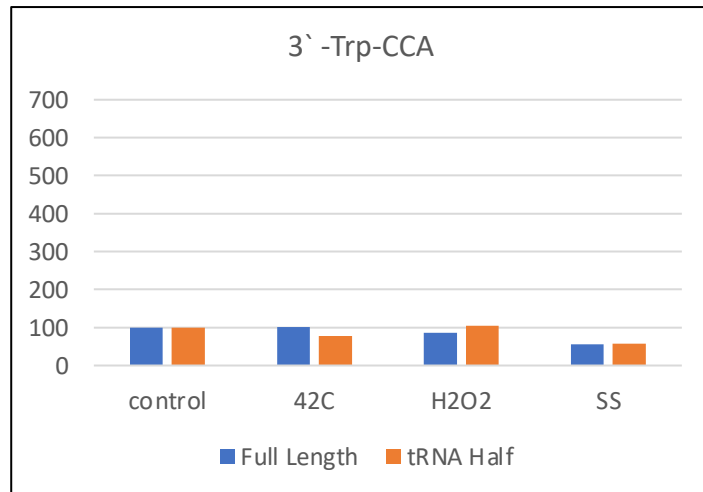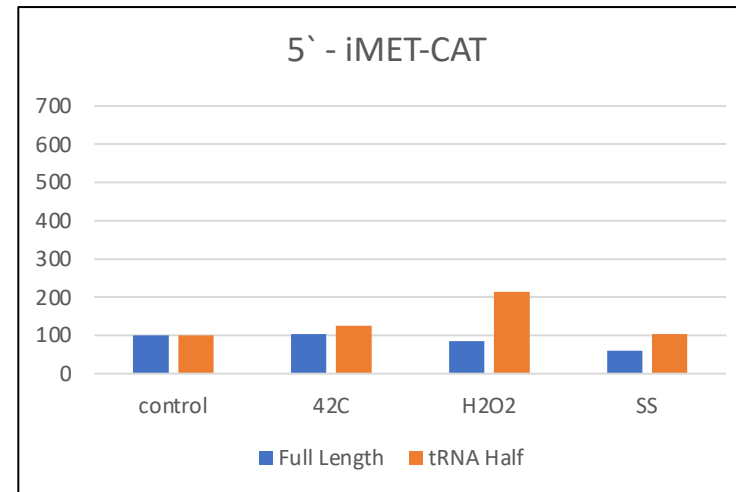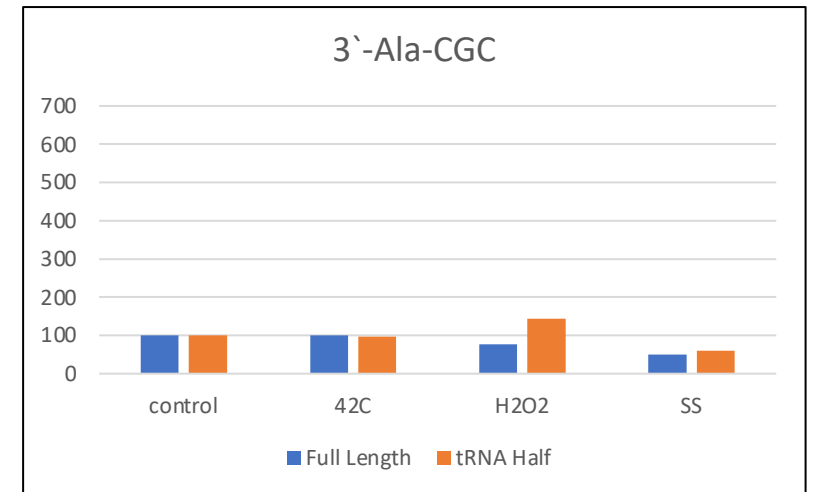

Supplement: mbio.03450-22-s0004.pdf [file mbio.03450-22-s0004.pdf]
